# Supplementary material
Source: PubMed Central journal article supplement (PMC7061962)
Supplement: NIHMS954753-supplement-Supplemental_Table_1_-_ICD-9_CM_codes_-.pdf [file NIHMS954753-supplement-Supplemental_Table_1_-_ICD-9_CM_codes_-.pdf]

## Supplemental Table 1. ICD-9 CM Codes

| <b><i>Hypertensive Disorders of Pregnancy – Excluding Chronic Hypertension</i></b> |        |
|------------------------------------------------------------------------------------|--------|
| Transient Hypertension of Pregnancy                                                | 642.3  |
| Mild or Unspecified Preeclampsia                                                   | 642.4  |
| Severe Preeclampsia                                                                | 642.5  |
| Eclampsia                                                                          | 642.6  |
| Preeclampsia or Eclampsia Superimposed on Pre-Existing Hypertension                | 642.7  |
| <b><i>Cardiovascular Readmission Diagnoses</i></b>                                 |        |
| Acute Myocardial Infarction                                                        | 410.x  |
| Dissection of Coronary Artery                                                      | 414.12 |
| Subarachnoid Hemorrhage                                                            | 430    |
| Intracerebral Hemorrhage                                                           | 431    |
| Other and Unspecified Intracranial Hemorrhage                                      | 432.x  |
| Occlusion and Stenosis of Precerebral Arteries                                     | 433.x  |
| Occlusion of Cerebral Arteries                                                     | 434.x  |
| Transient Cerebral Ischemia                                                        | 435.x  |
| Acute, but ill-defined, Cerebrovascular Disease                                    | 436    |
| Heart Failure                                                                      | 428.x  |
| Other Primary Cardiomyopathy                                                       | 425.4  |
| Cardiomyopathy in Other Diseases Classified Elsewhere                              | 425.8  |
| Peripartum Cardiomyopathy                                                          | 674.5  |
